# Supplementary figures and images for: Adult Stature and Risk of Cancer at Different Anatomic Sites in a Cohort of Postmenopausal Women
Source: Oxford University Press journal article supplement (doi:10.1158/1055-9965.epi-13-0305), 2013-07-26

Supplementary Fig. 4

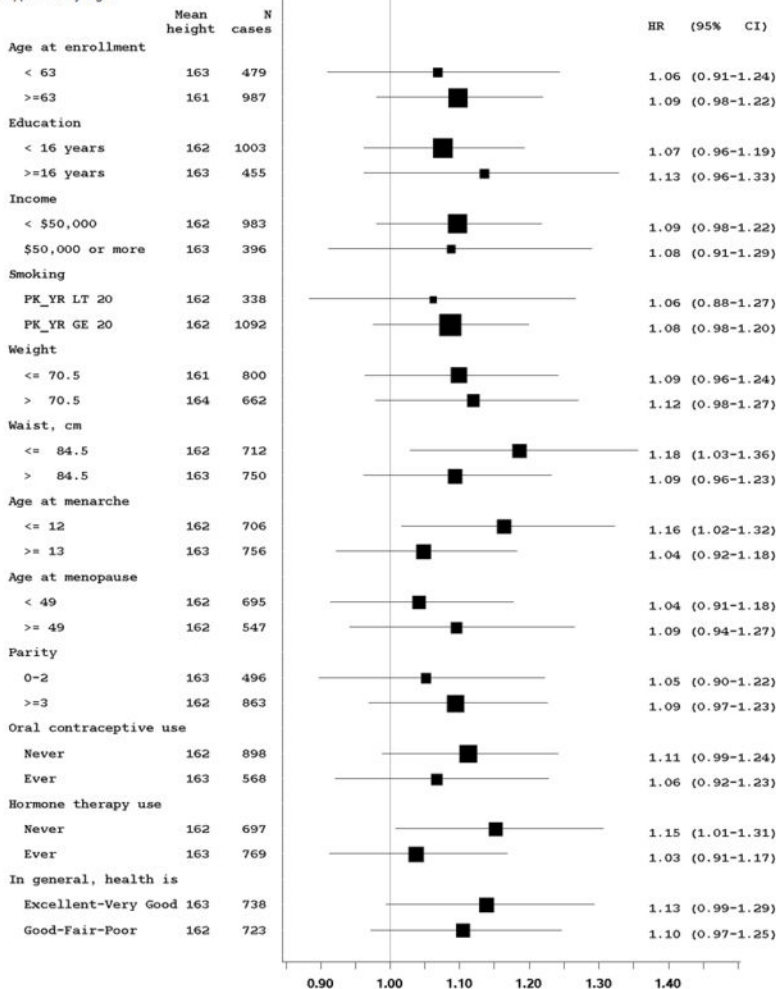

Supplement: 10559965epi130305-sup-fig_4.pdf [file 10559965epi130305-sup-fig_4.pdf]
